# Supplementary material
Source: MDPI journal article supplement (https://www.mdpi.com/2073-4344/10/2/156)
Supplement: s1 [file s1]

*Supporting Information*

Oxygen Reduction Reaction Catalyzed by Pt3M (M= 3d Transition Metals) Supported on O-doped Graphene

Chaonan Cui1,2,3, Mengnan Sun1, Xinli Zhu1, Jinyu Han1, Hua Wang1,2* and Qingfeng Ge2*

1 Key Laboratory for Green Chemical Technology of the Ministry of Education, School of Chemical Engineering and Technology, Collaborative Innovation Center of Chemical Science and Engineering, Tianjin University, Tianjin 300072, P. R. China.

2 Department of Chemistry and Biochemistry, Southern Illinois University, Carbondale, IL 62901, USA.

3 State Key Laboratory for Structural Chemistry of Unstable and Stable Species, Institute of Chemistry, Chinese Academy of Sciences, Beijing 100190, China.

H. Wang (E-mail: tjuwanghua@tju.edu.cn)

Q. Ge (E-mail: qge@chem.siu.edu)

**Table S1.** Optimized structures for O-doped graphene (OG) supported Pt3M (M= 3d transition metals) and Pt4 alloy clusters. Red, dark blue and grey spheres represent O, Pt and C, respectively. The color of M is different and depends on the element.

| Cluster | Side view | Top view |
| --- | --- | --- |
| Pt3Sc | 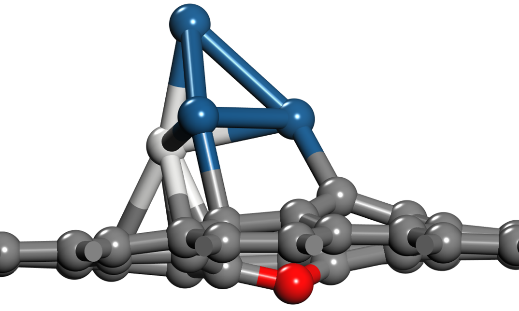 | 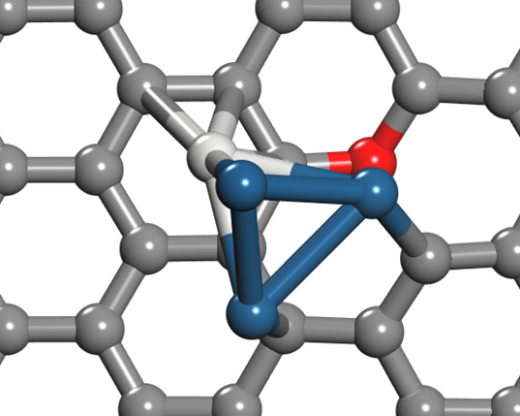 |
| Pt3Ti | 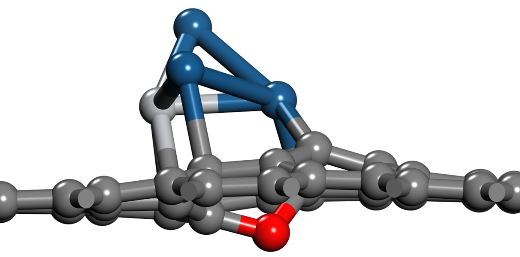 | 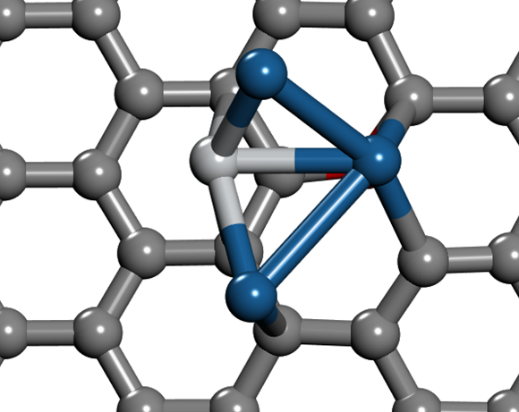 |
| Pt3V | 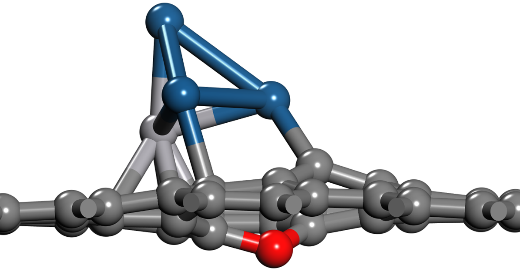 | 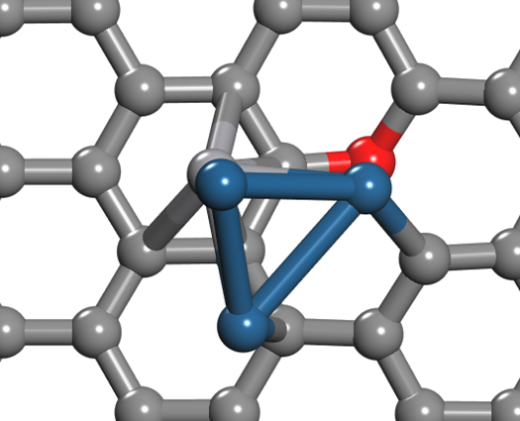 |
| Pt3Cr | 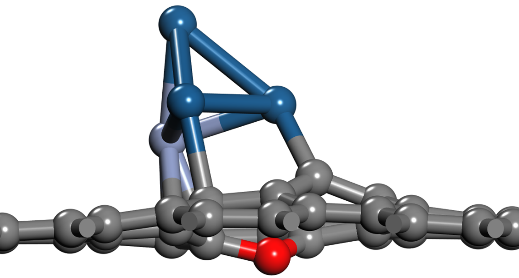 | 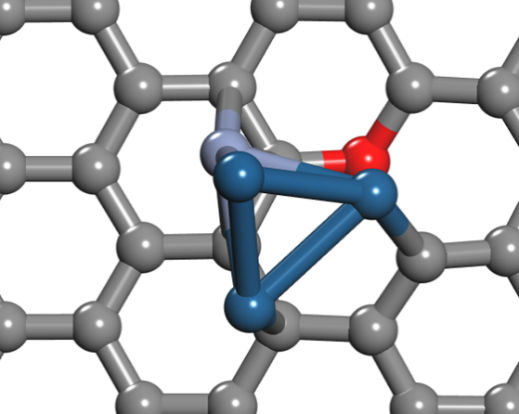 |
| Pt3Mn | 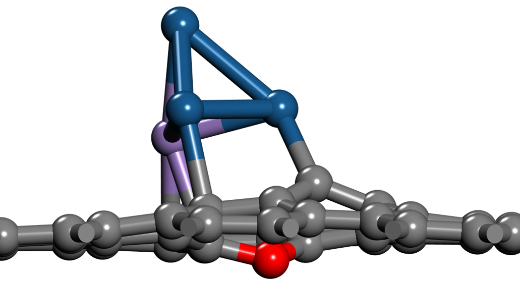 | 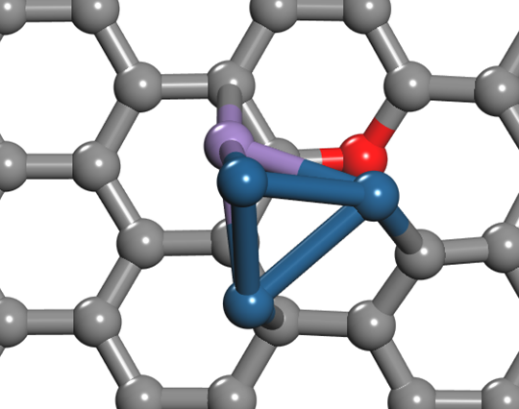 |
| Pt3Fe | 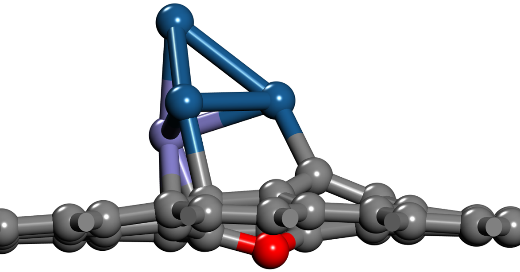 | 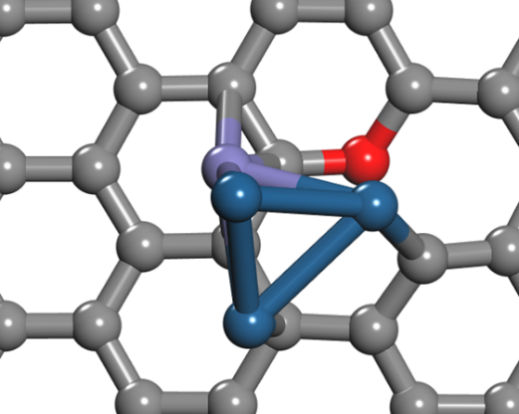 |
| Pt3Co | 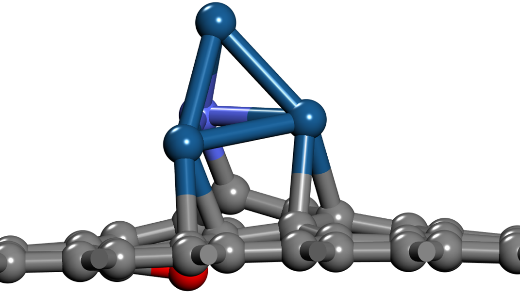 | 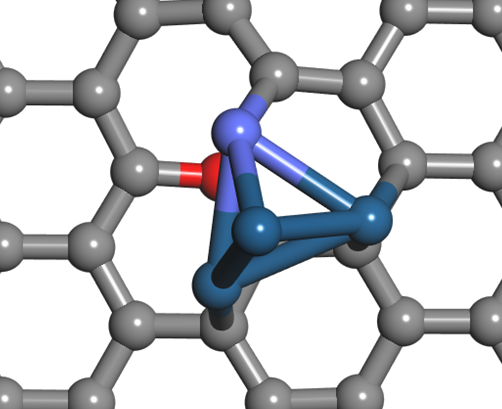 |
| Pt3Ni | 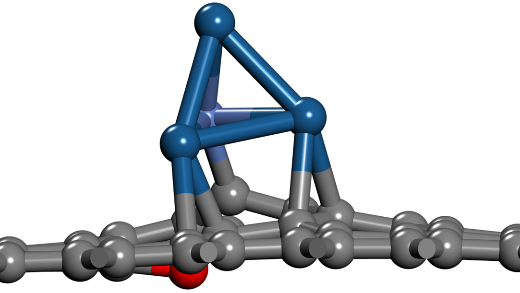 | 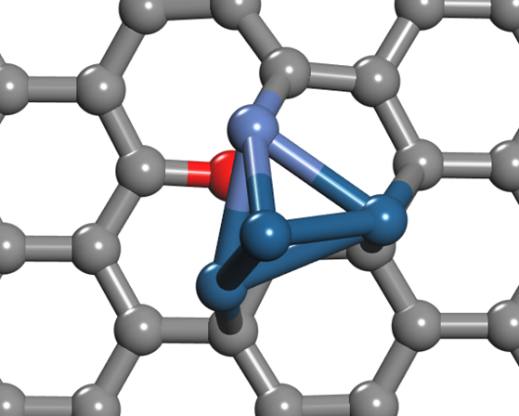 |
| Pt4 | 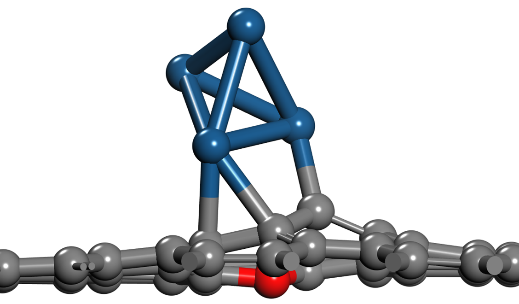 | 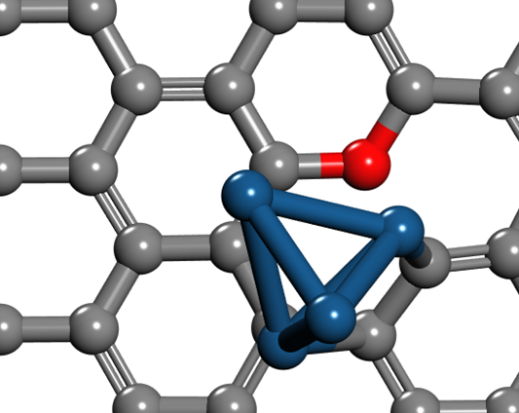 |


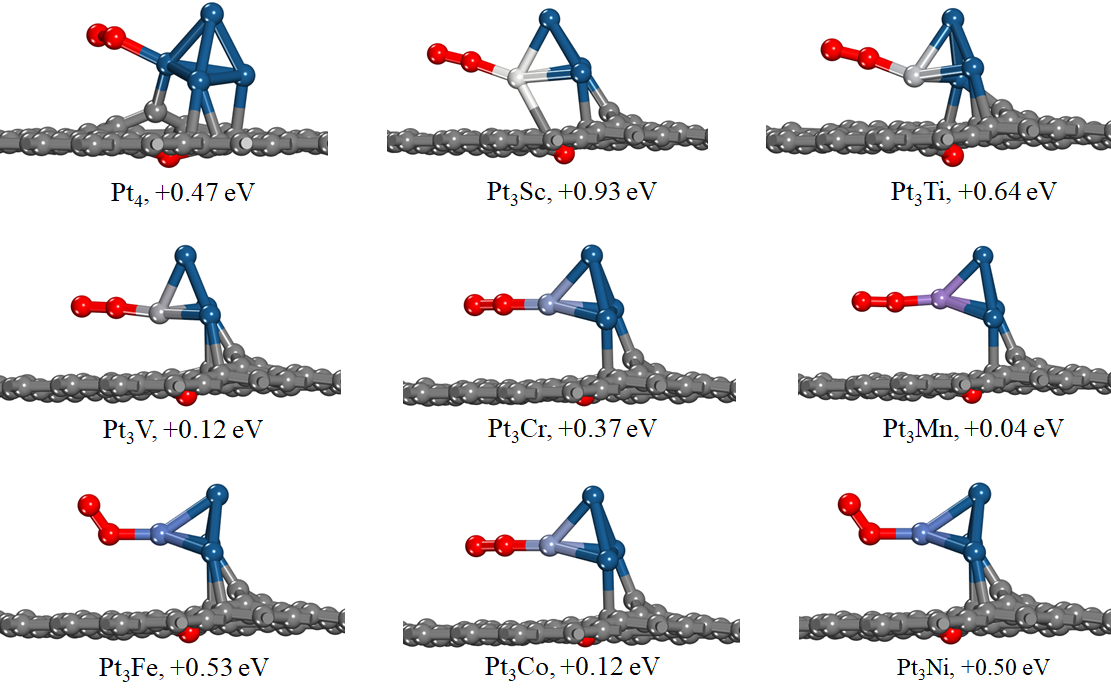


**Figure S1.** End-on adsorption of O2 on the bottom M atom of OG-Pt3M and the corresponding relative adsorption energy with respect to bridging di-oxygen form.

**Table S2.** Free energy change (ΔG) of every elementary step of ORR for different OG supported Pt3M and Pt4 clusters as the interfacial site is first hydrogenated. “-” means this step is invalid for the catalyst. The data shown in bold present the free energy change of rate limiting step.

|  | ΔG/eV: The free energy change on the interfacial site | | | | | | | | | |
| --- | --- | --- | --- | --- | --- | --- | --- | --- | --- | --- |
|  | Pt3Sc | Pt3Ti | Pt3V | Pt3Cr | | Pt3Mn | Pt3Fe | Pt3Co | Pt3Ni | Pt4 |
| O2 +*→2O* | -1.39 | -1.73 | -1.47 | | -1.40 | -0.75 | -0.85 | -0.81 | -0.62 | -1.02 |
| 2O*+H+→OHb*+O* | -2.35 | -2.34 | -2.76 | | -2.51 | -2.86 | -2.76 | -2.38 | -2.52 | -1.95 |
| OHb*+O*+H+→  H2Ob*+O* | - | - | - | | 0.53 | 0.24 | 0.19 | -0.27 | -0.22 | -0.37 |
| OHb*+O*+H+→ 2OH* | -1.44 | -1.47 | -1.01 | | -1.00 | -1.14 | 0.10 | -1.42 | -0.90 | -1.67 |
| 2OH*+H+→H2Ob*+OH* | **0.32** | **0.31** | **0.46** | | **0.48** | **0.29** | -0.88 | **0.23** | **-0.02** | **0.15** |
| H2Ob*+OH*+H+→2H2O* | -0.16 | -0.09 | -0.15 | | 0.13 | 0.10 | **0.12** | 0.04 | -0.08 | 0.08 |

**Table S3.** Free energy change (ΔG) of every elementary step of ORR for different OG supported Pt3M and Pt4 clusters as the top site is first hydrogenated. “-” means this step is invalid for the catalyst. The data shown in bold present the free energy change of rate limiting step.

|  | ΔG/eV: The free energy change on the top site | | | | | | |
| --- | --- | --- | --- | --- | --- | --- | --- |
| Pt3Ti | Pt3V | Pt3Cr | Pt3Mn | Pt3Fe | Pt3Co | Pt3Ni |
| O2 +*→2O* | -1.74 | -1.47 | -1.39 | -0.75 | -0.85 | -0.81 | -0.62 |
| 2O*+H+→OHt*+O* | -1.32 | -1.14 | -1.13 | -2.78 | -2.74 | -2.91 | -2.38 |
| OHt*+O*+H+→H2Ot* +O* | - | - | -0.08 | -0.02 | 0.31 | 0.32 | 0.32 |
| OHt*+O*+H+→ 2OH* | -0.91 | 0.00 | -0.25 | -1.23 | 0.09 | -0.88 | -1.04 |
| 2OH*+H+→H2Ot*+OH* | **0.40** | **0.25** | 0.09 | 0.03 | -1.27 | **0.35** | -0.24 |
| H2Ot*+OH*+H+→2H2O* | -0.18 | 0.07 | **0.53** | **0.36** | **0.52** | -0.09 | **0.13** |


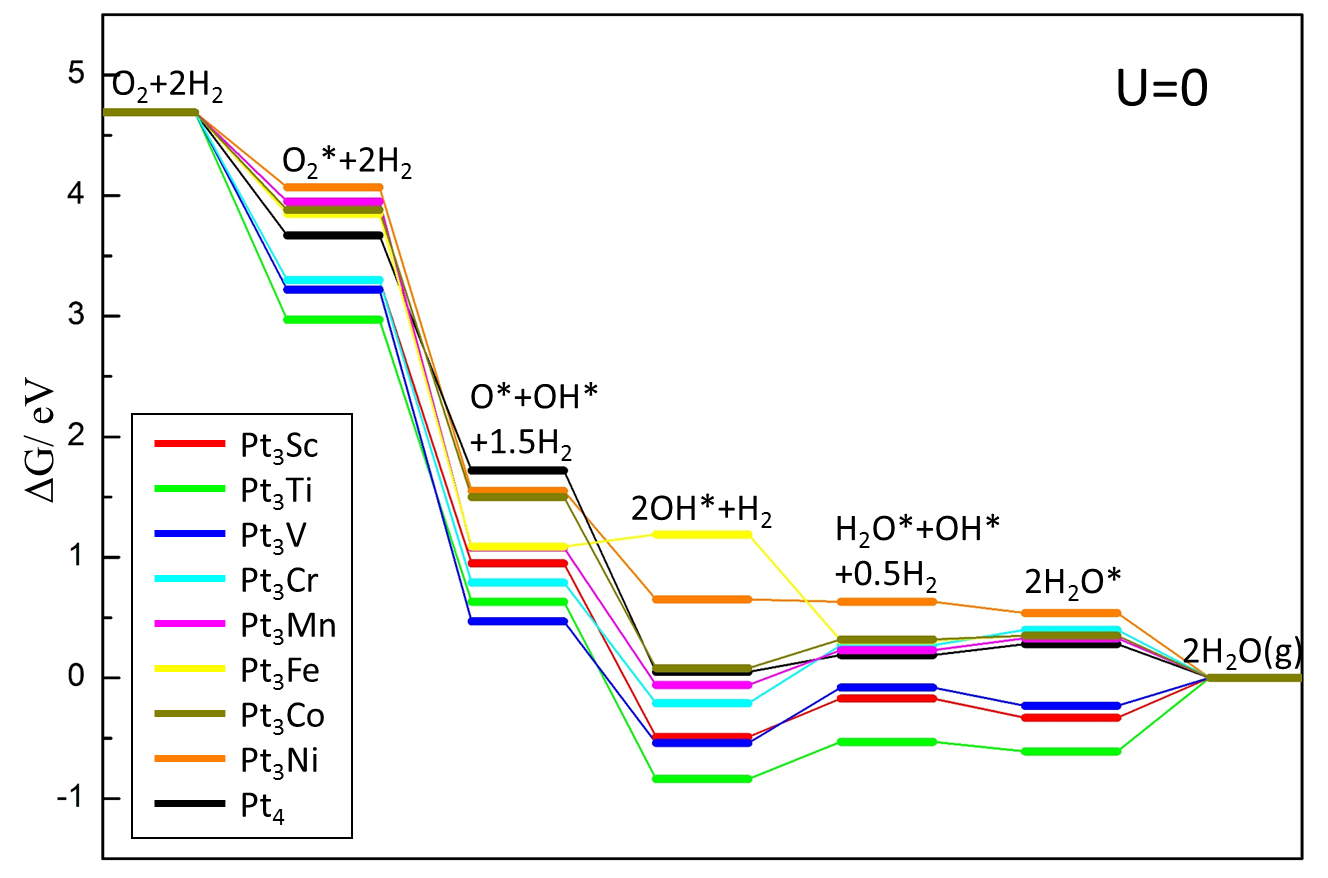


**Figure S2.** Free energy diagrams for oxygen reduction on OG supported Pt3M (M= 3d transition metals) and Pt4 clusters at 0 V.


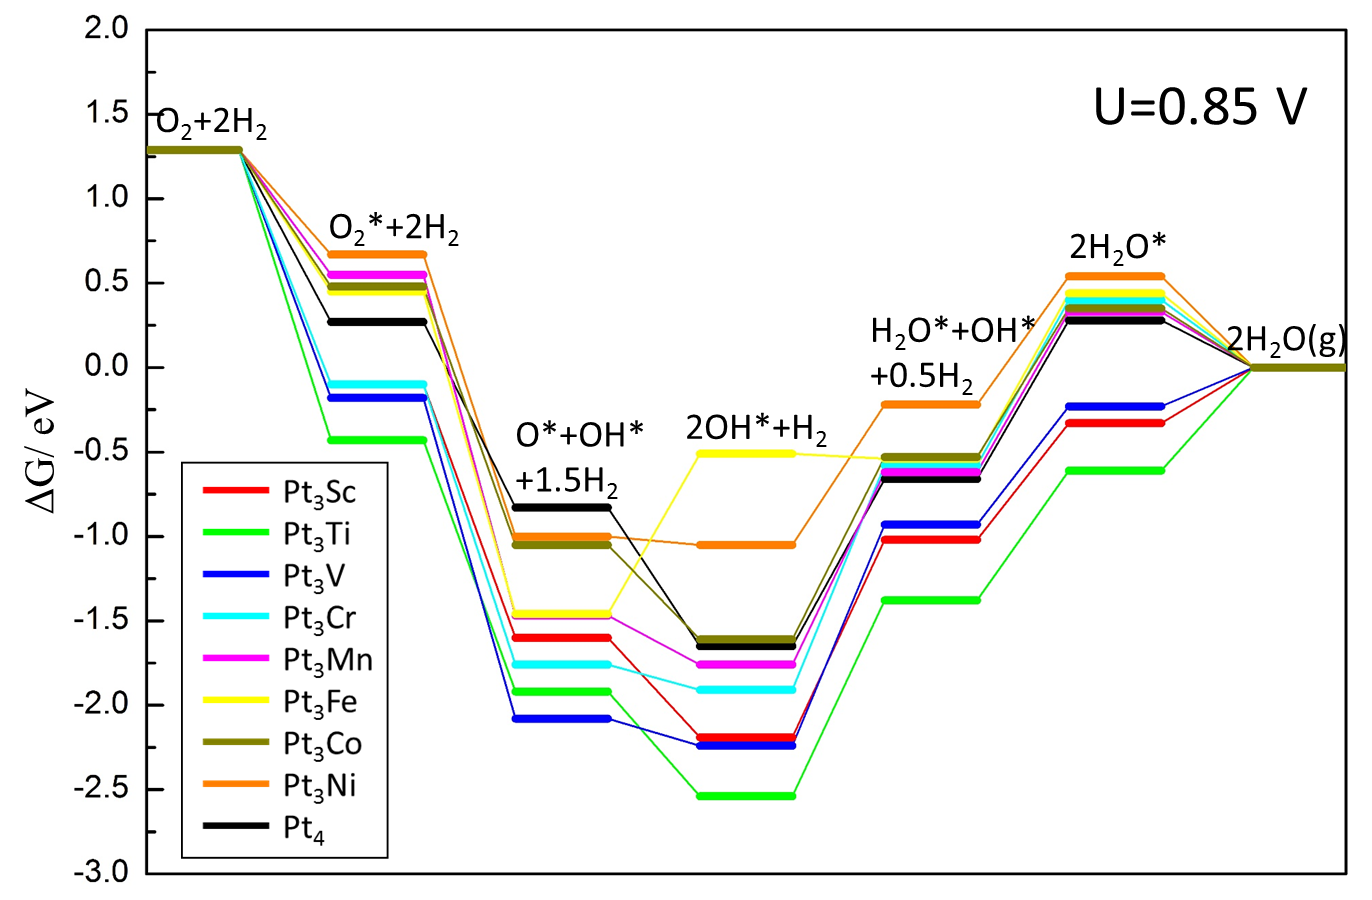


**Figure S3.** Free energy diagrams for oxygen reduction on OG supported Pt3M (M= 3d transition metals) and Pt4 clusters at 0.85 V (SHE).


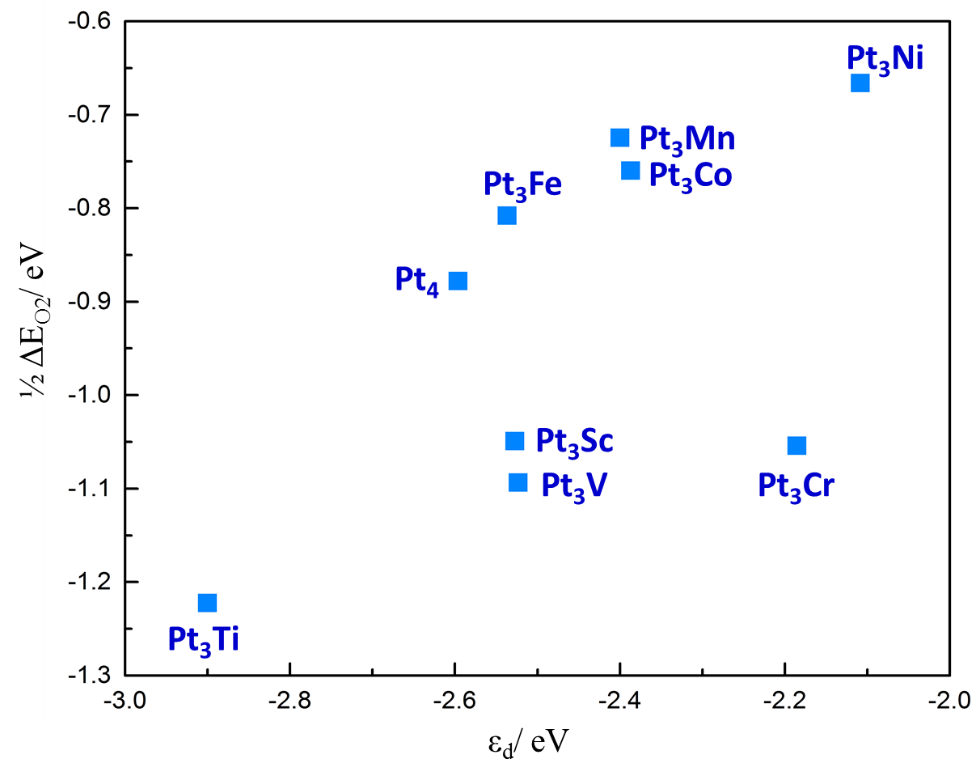


**Figure S4.** Average adsorption energies of O2 on the OG-Pt3M clusters as a function of the d-band center (εd) of the Pt atoms in clusters.


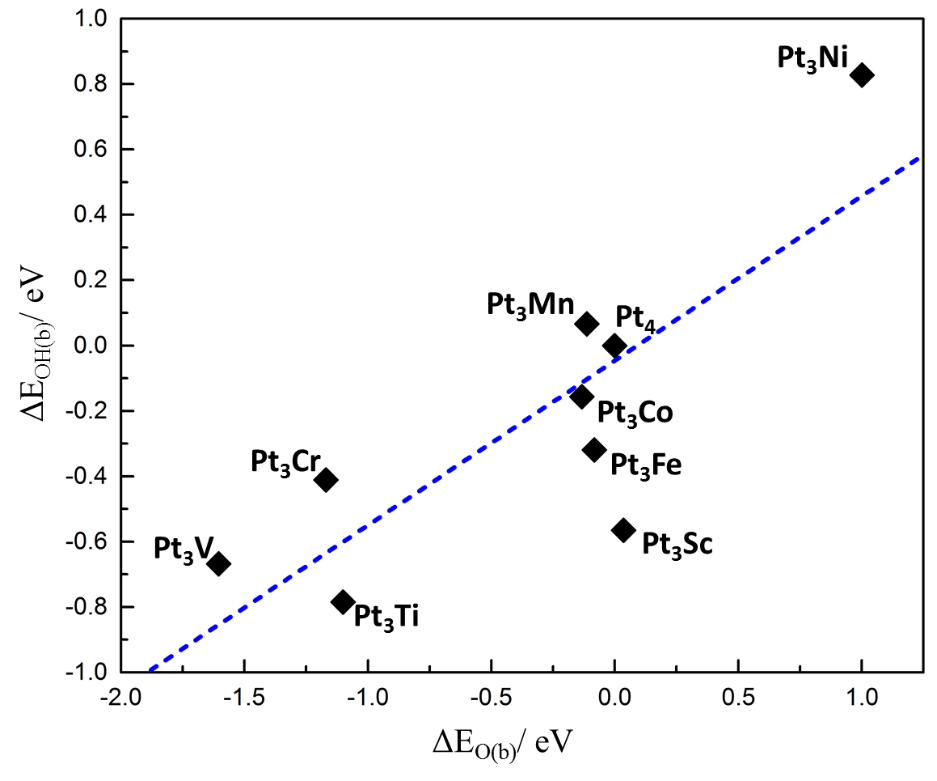


**Figure S5.** Relationship between the adsorption energy of O* and OH* on the interfacial sites of Pt3M alloy clusters**.**


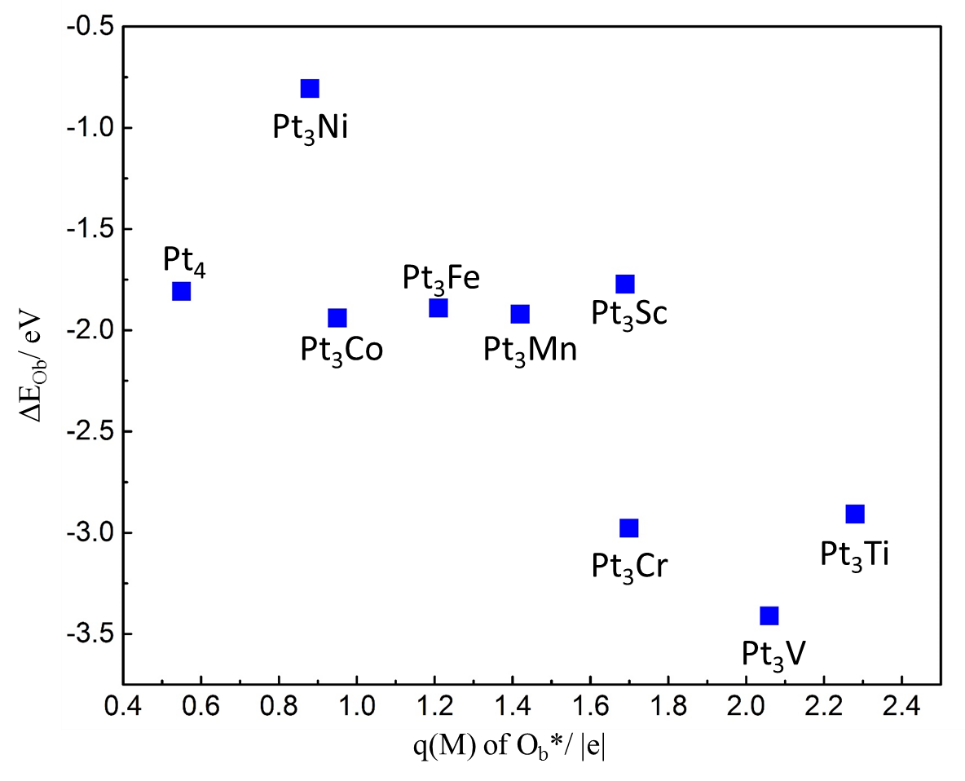


**Figure S6.** The adsorption energy of oxygen atom on the bottom site (ΔE(Ob)) as a function of the Bader charge q(M) of Ob* intermediate.
